# Supplementary material for: Association between Temporomandibular Joint Disorder and Parkinson’s Disease
Source: MDPI journal article supplement (doi:10.3390/brainsci11060747), 2021-06-04
Supplement: s1 [file s1]

**Table S1 Subgroup analyses of odd ratios for TMD in PD and non-PD in study I**

| Characteristics                                                                        | Odd ratios (95% confidence interval) for TMD |         |                  |         |
|----------------------------------------------------------------------------------------|----------------------------------------------|---------|------------------|---------|
|                                                                                        | Crude                                        | P-value | Adjusted†        | P-value |
| BMI < 23 (n = 8,578)                                                                   |                                              |         |                  |         |
| PD                                                                                     | 1.36 (0.82-2.25)                             | 0.235   | 1.40 (0.84-2.32) | 0.196   |
| Non-PD                                                                                 | 1.00                                         |         | 1.00             |         |
| BMI ≥ 23 (n = 13,697)                                                                  |                                              |         |                  |         |
| PD                                                                                     | 1.47 (0.94-2.30)                             | 0.092   | 1.51 (0.96-2.37) | 0.072   |
| Non-PD                                                                                 | 1.00                                         |         | 1.00             |         |
| Nonsmoker (n = 16,826)                                                                 |                                              |         |                  |         |
| PD                                                                                     | 1.50 (1.05-2.14)                             | 0.024*  | 1.53 (1.07-2.19) | 0.019*  |
| Non-PD                                                                                 | 1.00                                         |         | 1.00             |         |
| Past smoker and current smoker (n = 5,449)                                             |                                              |         |                  |         |
| PD                                                                                     | 0.89 (0.30-2.63)                             | 0.838   | 0.92 (0.31-2.72) | 0.875   |
| Non-PD                                                                                 | 1.00                                         |         | 1.00             |         |
| Alcohol consumption < 1 time a week (n = 15,830)                                       |                                              |         |                  |         |
| PD                                                                                     | 1.39 (0.96-2.02)                             | 0.081   | 1.42 (0.97-2.06) | 0.068   |
| Non-PD                                                                                 | 1.00                                         |         | 1.00             |         |
| Alcohol consumption ≥ 1 time a week (n = 6,445)                                        |                                              |         |                  |         |
| PD                                                                                     | 1.59 (0.74-3.45)                             | 0.238   | 1.59 (0.73-3.46) | 0.244   |
| Non-PD                                                                                 | 1.00                                         |         | 1.00             |         |
| Systolic blood pressure < 140 mmHg and diastolic blood pressure < 90 mmHg (n = 16,594) |                                              |         |                  |         |
| PD                                                                                     | 1.49 (0.99-2.24)                             | 0.059   | 1.49 (0.98-2.24) | 0.060   |
| Non-PD                                                                                 | 1.00                                         |         | 1.00             |         |
| Systolic blood pressure ≥ 140 mmHg or diastolic blood pressure ≥ 90 mmHg (n = 5,681)   |                                              |         |                  |         |
| PD                                                                                     | 1.43 (0.80-2.55)                             | 0.232   | 1.45 (0.81-2.61) | 0.213   |
| Non-PD                                                                                 | 1.00                                         |         | 1.00             |         |
| Fasting blood glucose < 100 mg/dL (n = 14,150)                                         |                                              |         |                  |         |

|                                                    |                  |        |                  |        |
|----------------------------------------------------|------------------|--------|------------------|--------|
| PD                                                 | 1.18 (0.74-1.88) | 0.496  | 1.18 (0.74-1.90) | 0.489  |
| Non-PD                                             | 1.00             |        | 1.00             |        |
| Fasting blood glucose $\geq$ 100 mg/dL (n = 8,125) |                  |        |                  |        |
| PD                                                 | 1.83 (1.13-2.96) | 0.013* | 1.85 (1.14-3.00) | 0.013* |
| Non-PD                                             | 1.00             |        | 1.00             |        |
| Total cholesterol < 200 mg/dL (n = 11,704)         |                  |        |                  |        |
| PD                                                 | 1.38 (0.88-2.16) | 0.164  | 1.38 (0.88-2.17) | 0.165  |
| Non-PD                                             | 1.00             |        | 1.00             |        |
| Total cholesterol $\geq$ 200 mg/dL (n = 10,571)    |                  |        |                  |        |
| PD                                                 | 1.50 (0.91-2.47) | 0.116  | 1.57 (0.95-2.61) | 0.080  |
| Non-PD                                             | 1.00             |        | 1.00             |        |

---

Abbreviation: CCI, Charlson Comorbidity Index;

\* Logistic regression model, Significance at  $P < 0.05$

† Models adjusted for obesity, smoking, alcohol consumption, systolic blood pressure, diastolic blood pressure, fasting blood glucose, total cholesterol and CCI scores.

**Table S2 Subgroup analyses of odd ratios for PD in TMD and non-TMD groups in study**

**II**

| Characteristics                                                                        | Odd ratios (95% confidence interval) for PD |         |                  |         |
|----------------------------------------------------------------------------------------|---------------------------------------------|---------|------------------|---------|
|                                                                                        | Crude                                       | P-value | Adjusted†        | P-value |
| BMI < 23 (n = 12,112)                                                                  |                                             |         |                  |         |
| TMD                                                                                    | 1.98 (1.28-3.08)                            | 0.002*  | 2.04 (1.31-3.19) | 0.002*  |
| Non-TMD                                                                                | 1.00                                        |         | 1.00             |         |
| BMI ≥ 23 (n = 18,268)                                                                  |                                             |         |                  |         |
| TMD                                                                                    | 1.10 (0.69-1.74)                            | 0.702   | 1.12 (0.70-1.79) | 0.628   |
| Non-TMD                                                                                | 1.00                                        |         | 1.00             |         |
| Nonsmoker (n = 23,058)                                                                 |                                             |         |                  |         |
| TMD                                                                                    | 1.54 (1.08-2.20)                            | 0.017*  | 1.56 (1.09-2.24) | 0.015*  |
| Non-TMD                                                                                | 1.00                                        |         | 1.00             |         |
| Past smoker and current smoker (n = 7,322)                                             |                                             |         |                  |         |
| TMD                                                                                    | 1.24 (0.61-2.49)                            | 0.553   | 1.26 (0.62-2.56) | 0.518   |
| Non-TMD                                                                                | 1.00                                        |         | 1.00             |         |
| Alcohol consumption < 1 time a week (n = 22,359)                                       |                                             |         |                  |         |
| TMD                                                                                    | 1.34 (0.91-1.96)                            | 0.135   | 1.34 (0.91-1.98) | 0.138   |
| Non-TMD                                                                                | 1.00                                        |         | 1.00             |         |
| Alcohol consumption ≥ 1 time a week (n = 8,021)                                        |                                             |         |                  |         |
| TMD                                                                                    | 1.91 (1.09-3.35)                            | 0.024*  | 1.92 (1.09-3.38) | 0.024*  |
| Non-TMD                                                                                | 1.00                                        |         | 1.00             |         |
| Systolic blood pressure < 140 mmHg and diastolic blood pressure < 90 mmHg (n = 20,446) |                                             |         |                  |         |
| TMD                                                                                    | 1.43 (1.00-2.05)                            | 0.053   | 1.45 (1.00-2.09) | 0.048*  |
| Non-TMD                                                                                | 1.00                                        |         | 1.00             |         |
| Systolic blood pressure ≥ 140 mmHg or diastolic blood pressure ≥ 90 mmHg (n = 9,934)   |                                             |         |                  |         |
| TMD                                                                                    | 1.63 (0.85-3.13)                            | 0.138   | 1.73 (0.90-3.33) | 0.103   |

|                                                |                  |        |                  |        |
|------------------------------------------------|------------------|--------|------------------|--------|
| Non-TMD                                        | 1.00             |        | 1.00             |        |
| Fasting blood glucose < 100 mg/dL (n = 17,581) |                  |        |                  |        |
| TMD                                            | 1.59 (1.06-2.38) | 0.026* | 1.62 (1.07-2.44) | 0.022* |
| Non-TMD                                        | 1.00             |        | 1.00             |        |
| Fasting blood glucose ≥ 100 mg/dL (n = 12,799) |                  |        |                  |        |
| TMD                                            | 1.33 (0.80-2.19) | 0.268  | 1.36 (0.82-2.27) | 0.239  |
| Non-TMD                                        | 1.00             |        | 1.00             |        |
| Total cholesterol < 200 mg/dL (n = 16,603)     |                  |        |                  |        |
| TMD                                            | 1.18 (0.76-1.84) | 0.455  | 1.22 (0.78-1.90) | 0.383  |
| Non-TMD                                        | 1.00             |        | 1.00             |        |
| Total cholesterol ≥ 200 mg/dL (n = 13,777)     |                  |        |                  |        |
| TMD                                            | 1.89 (1.20-2.98) | 0.006* | 1.93 (1.21-3.06) | 0.006* |
| Non-TMD                                        | 1.00             |        | 1.00             |        |

---

Abbreviation: CCI, Charlson Comorbidity Index;

\* Logistic regression model, Significance at  $P < 0.05$

† Models adjusted for obesity, smoking, alcohol consumption, systolic blood pressure, diastolic blood pressure, fasting blood glucose, total cholesterol, and CCI scores.
